# Supplementary material for: ZnO long fibers: large scale fabrication, precursor and the transformation process, microstructure and catalytic performance
Source: Royal Society of Chemistry journal article supplement (doi:10.1039/c4ra07677j), 2014-01-01
Supplement: c4ra07677j1.pdf [file c4ra07677j1.pdf]

**Electronic Supplementary Information:**

**ZnO long fibers: large scale fabrication,  
precursor and the transformation process,  
microstructure and catalytic performance**

*Benxue Liu, Xuejun Lin, Xinqiang Wang, Luyi Zhu\*, Guanghui Zhang, Dong Xu\**

State Key Laboratory of Crystal Materials and Institute of Crystal Materials,

Shandong University, Jinan 250100, PR China

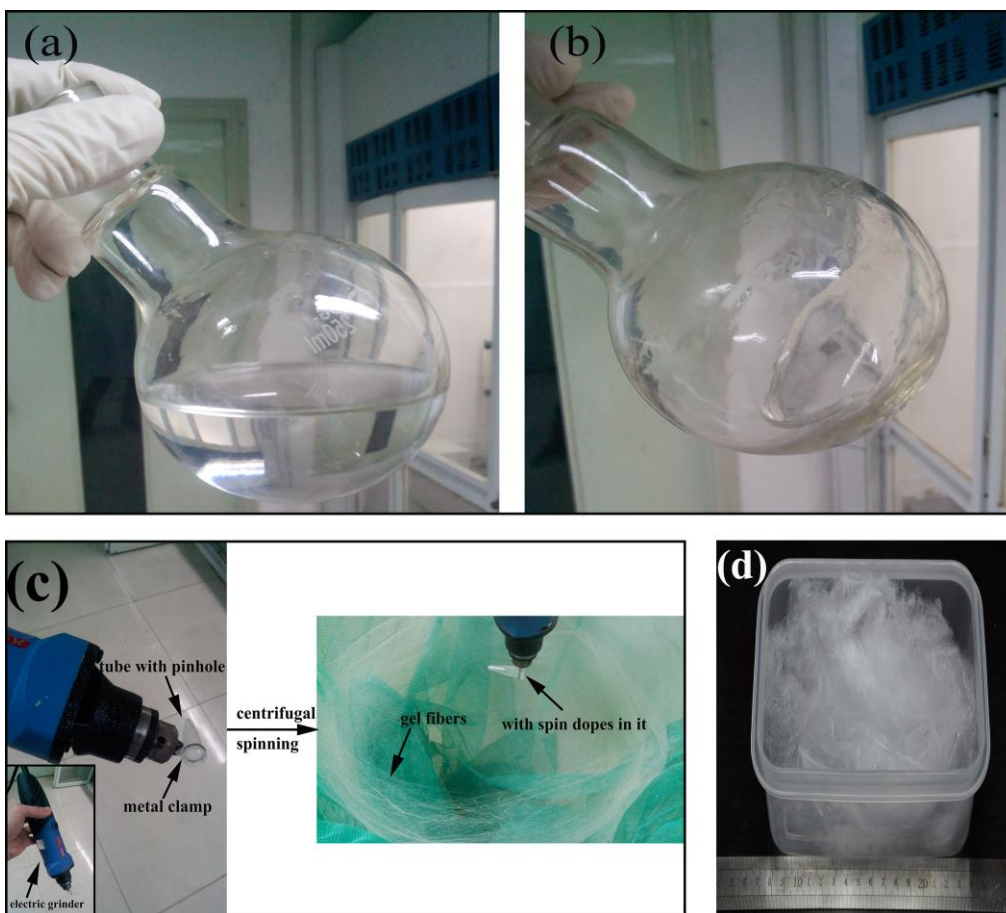

Figure S1. Digital images of (a) precursor solution (b) spin dopes (c) configuration of centrifugal-spinning device (d) precursor fibers in large scale

Table S1. the parameters of centrifugal process

|                                  |                                   |
|----------------------------------|-----------------------------------|
| Temperature                      | 25 °C                             |
| RH                               | 50 %                              |
| Rotating speed                   | 6000 rpm                          |
| Volume of spin tube              | 1.5 ml                            |
| Length of spin tube to collector | ~20 cm                            |
| Diameter of tube pinhole         | 375 $\mu\text{m}$                 |
| Viscosity                        | 24024 $\text{mPa} \cdot \text{s}$ |

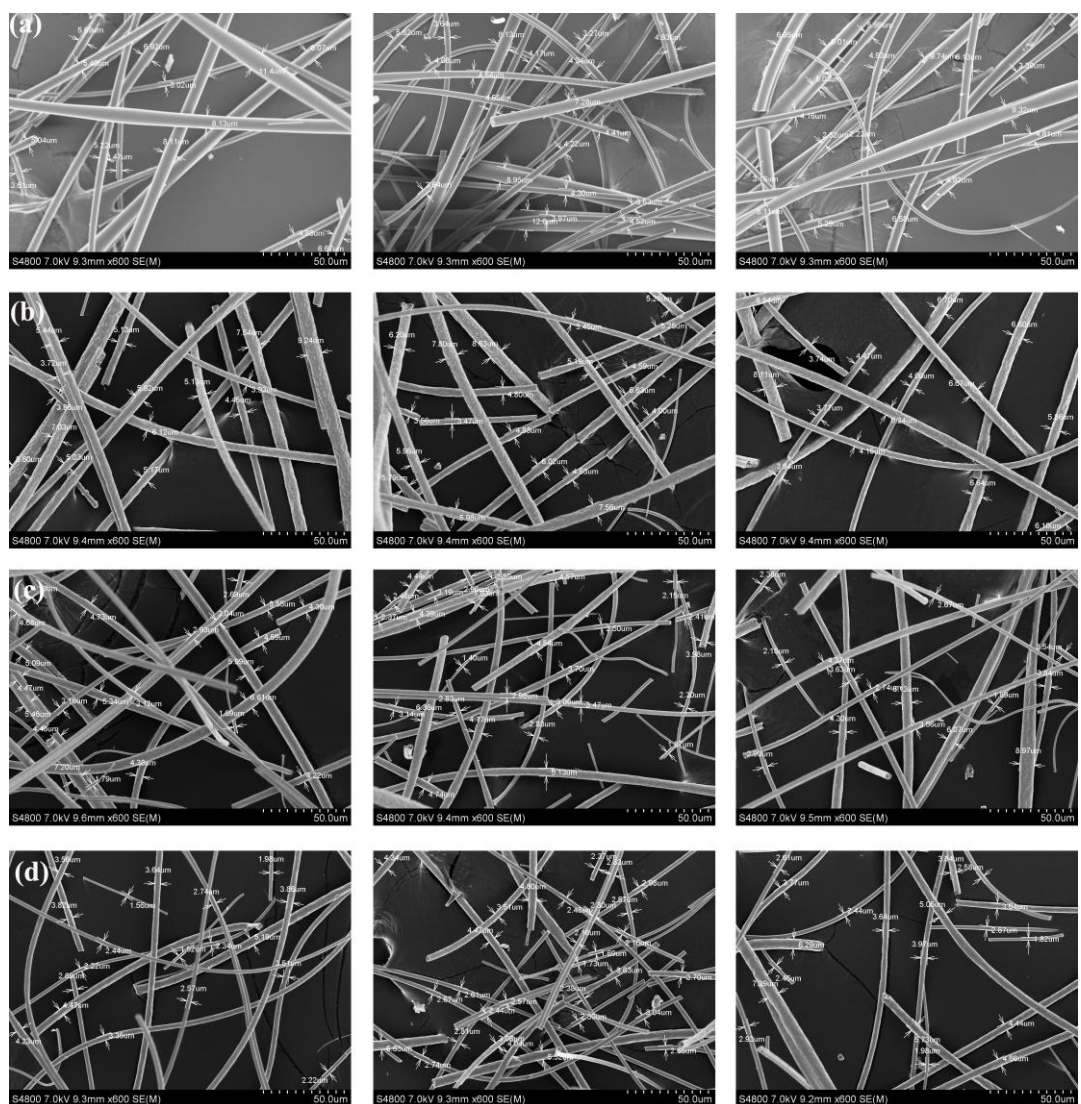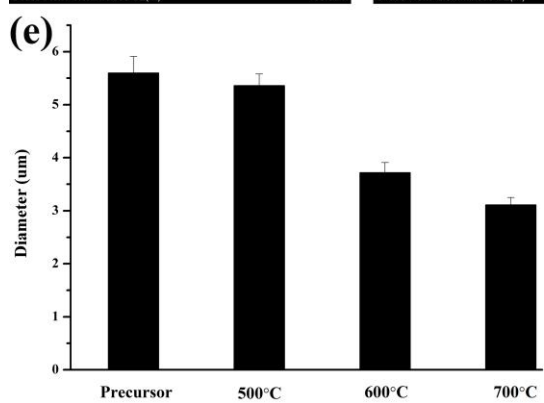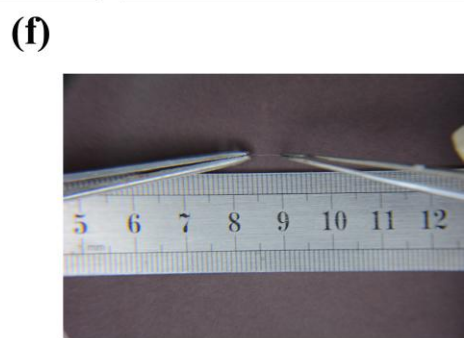

Figure S2. Diameter measurement of (a) precursor fibers, (b) fibers heat-treated at 500 °C, (c) 600 °C, (d) 700 °C, (e) statistics of diameter distribution, (f) length measurement of a single fiber heat-treated at 500 °C

For each sample, 50 diameter data were chose to analyze average diameter and standard error.

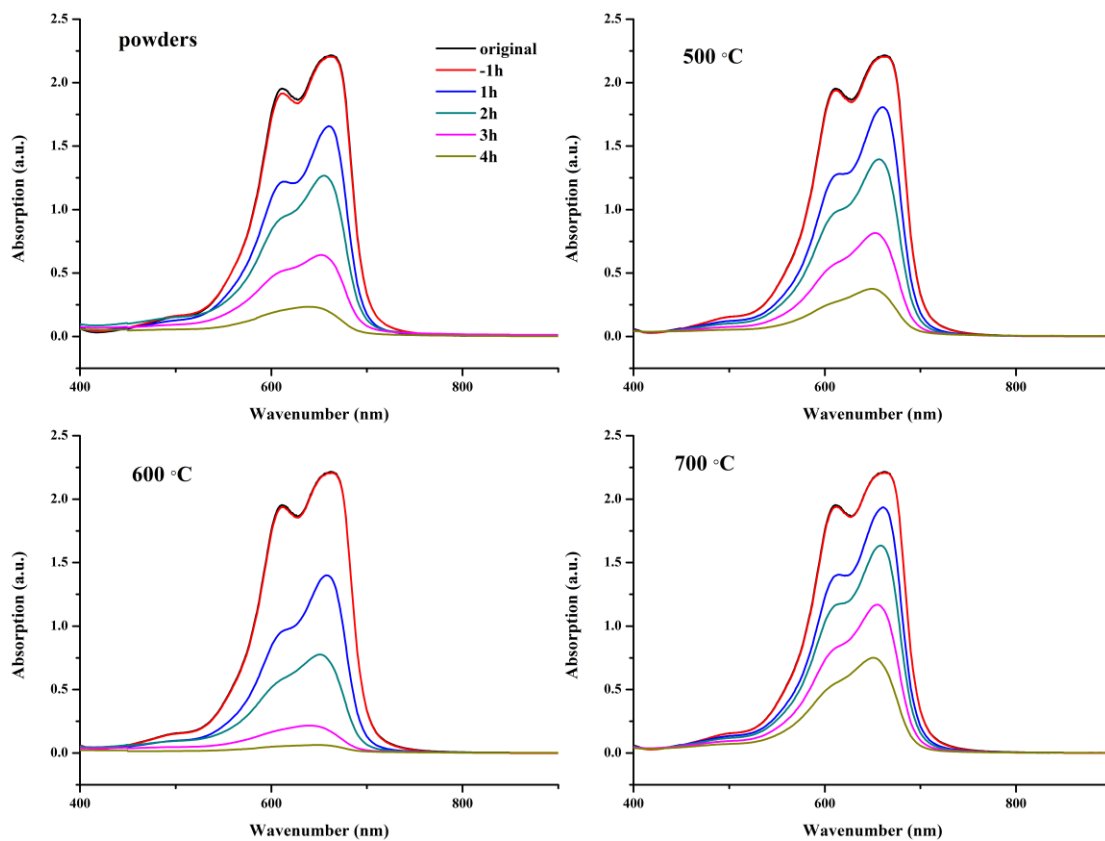

Figure S3. UV-Vis spectra recorded during the photocatalytic degradation of MB by using different catalysts.

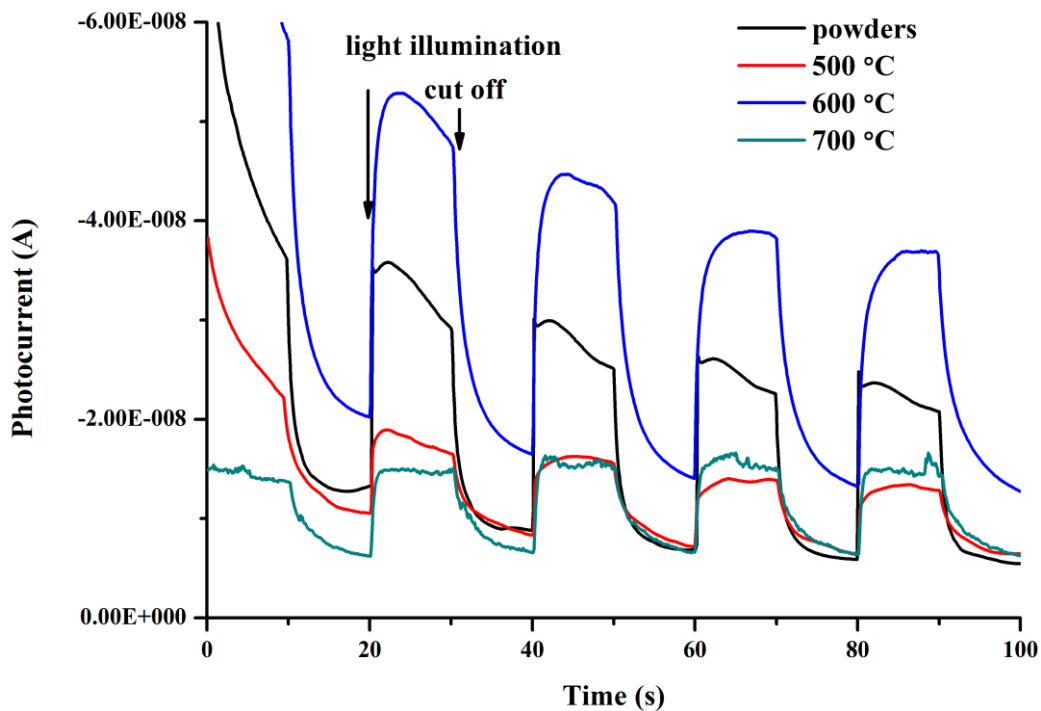

Figure S4. Photocurrent of powders and fibers heat-treated at different temperatures.

For photocurrent experiment, 10 mg of as-prepared fibers and ZnO powders were added into 0.5 ml of isopropanol. A uniform suspension was obtained after 20 min of ultrasonic treatment. The suspension was spin coated on a piece of ITO glass at a speed of 300 rps (10 s) and 800 rps (20s). The specimen was dried at room temperature for 1 h. The ITO glasses coated with fibers and powders were used as working electrode. A platinum sheet and an Ag/AgCl electrode were used as counter and reference electrodes, respectively. A Xe lamp (300 W) was used as the light source. The electrolyte solution was a  $\text{Na}_2\text{SO}_4$  aqueous solution ( $0.2 \text{ mol/L}^{-1}$ ).

Table S2. BET surface area of powders and fibers

| sample  | BET surface area ( $\text{m}^2/\text{g}$ ) | Pore volume ( $\text{cm}^3/\text{g}$ ) | Pore size( $\text{\AA}$ ) |
|---------|--------------------------------------------|----------------------------------------|---------------------------|
| powders | 1.29                                       | 0.002                                  | -                         |
| 500 °C  | 10.96                                      | 0.054                                  | 197.50                    |
| 600 °C  | 0.33                                       | 0.023                                  | 2719.40                   |
| 700 °C  | -                                          | 0.002                                  | -                         |

The minus indicates the value is very low that the instrument can not give a credible analysis.
